# Supplementary material for: Overexpressed MET drives aggressive thyroid cancer phenotypes and serves as a precision therapeutic target
Source: Springer Nature journal article supplement (doi:10.1038/s41598-025-23587-7), 2025-11-13

F1D-Patient1-Normal

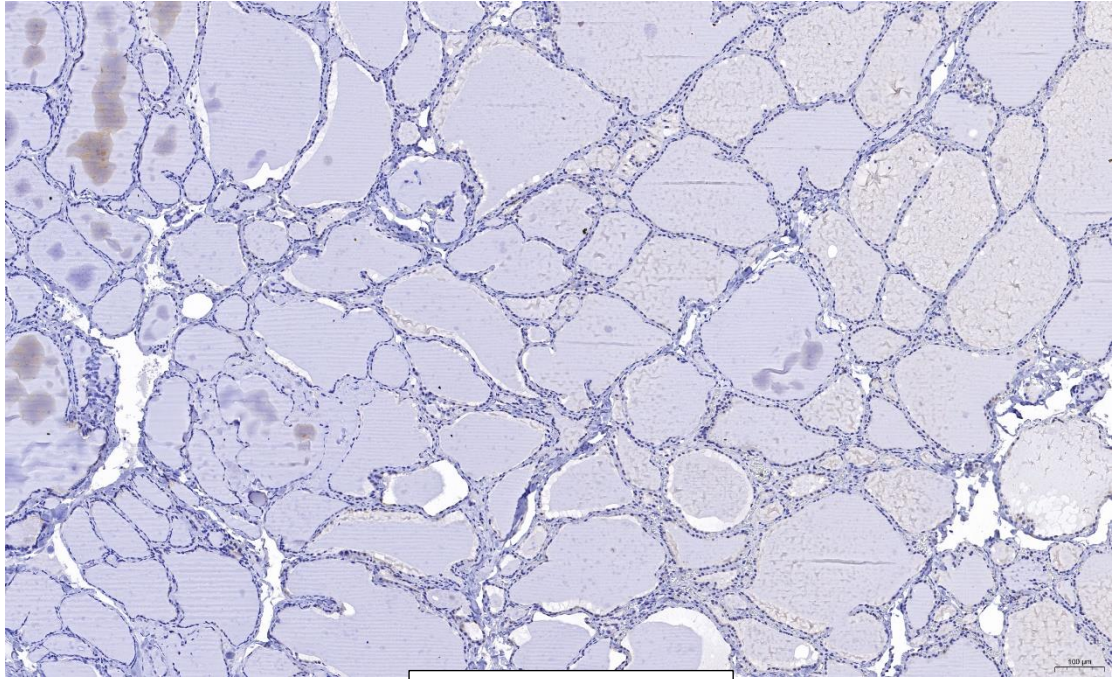

F1D-Patient1-Tumor

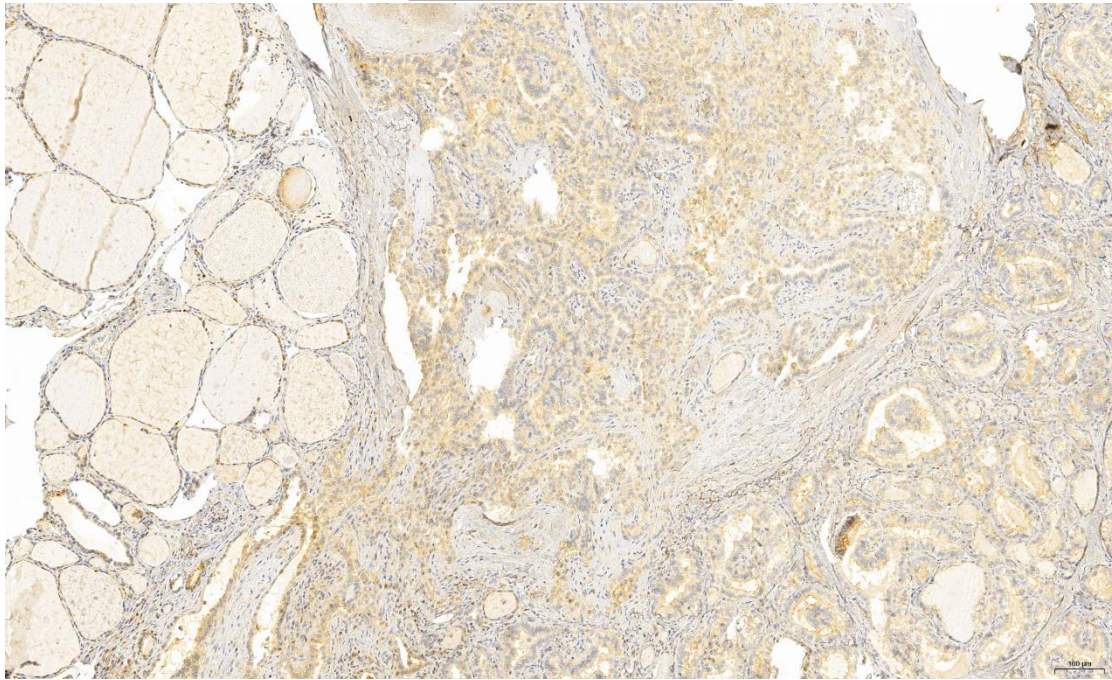

F1D-Patient2-Normal

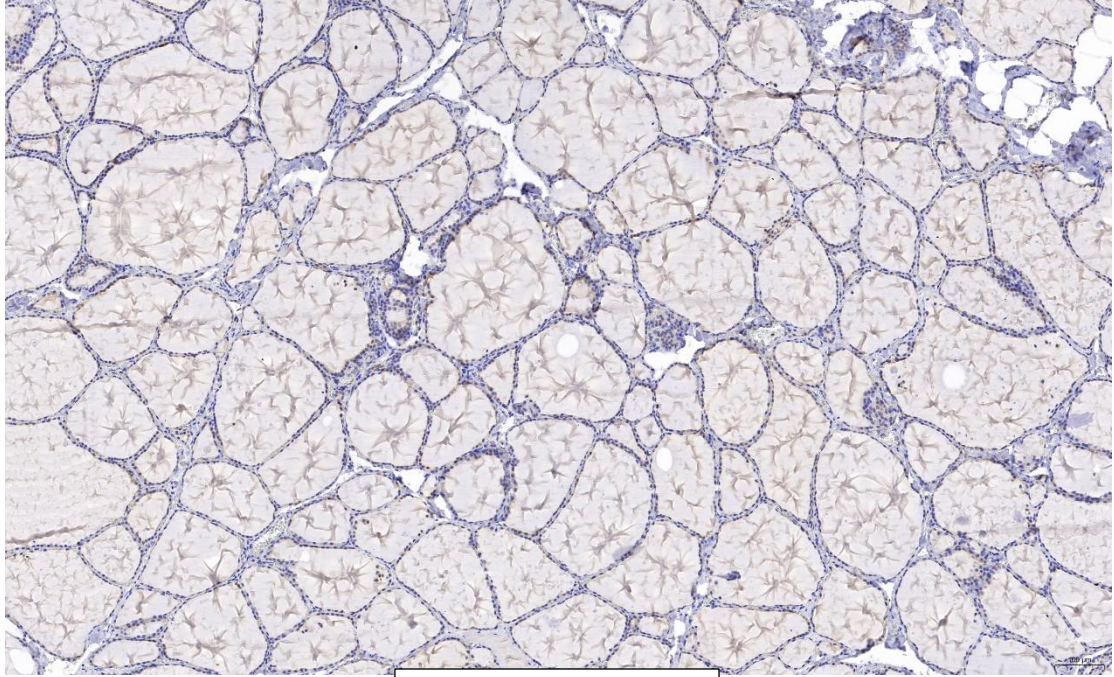

F1D-Patient2-Tumor

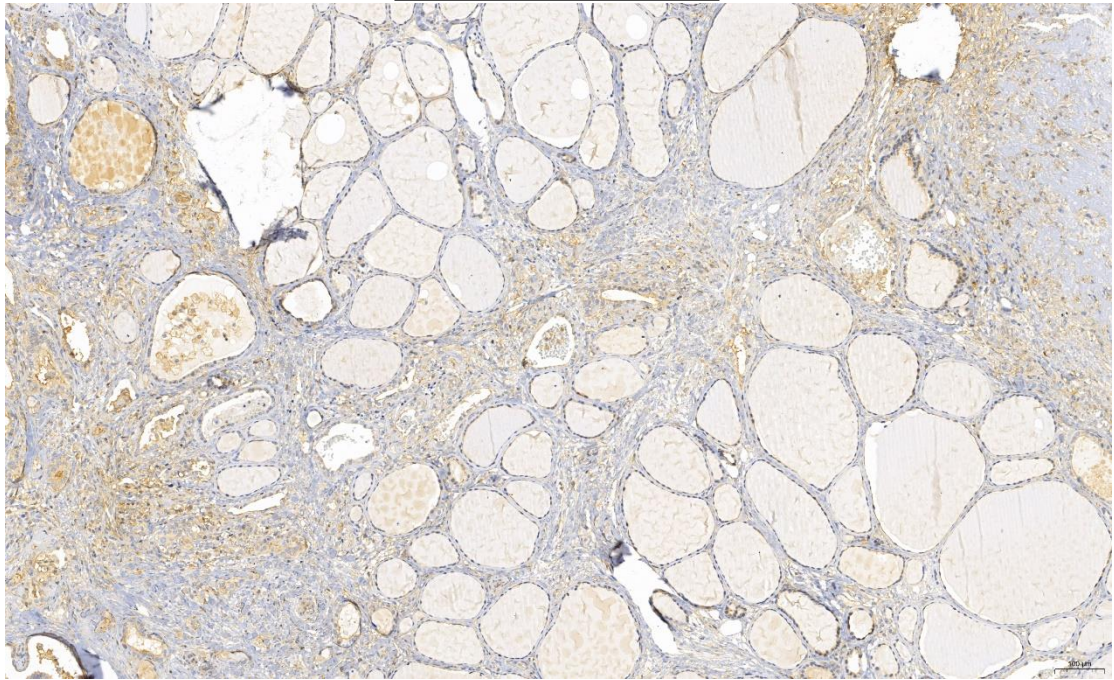

F1D-Patient3-Normal

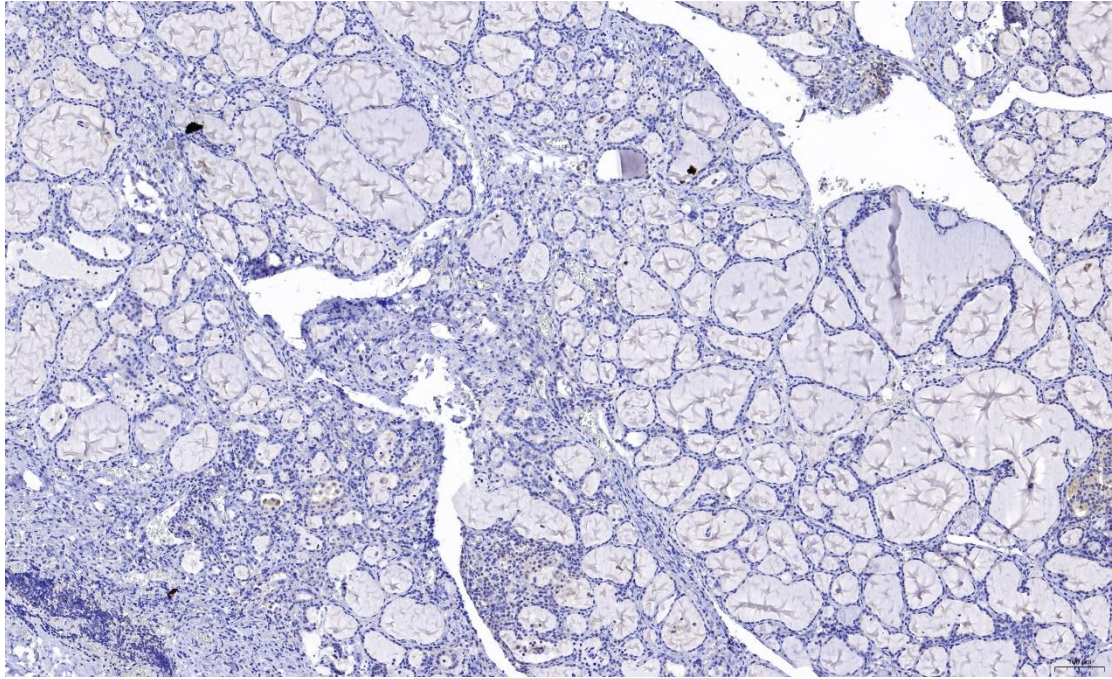

F1D-Patient3-Tumor

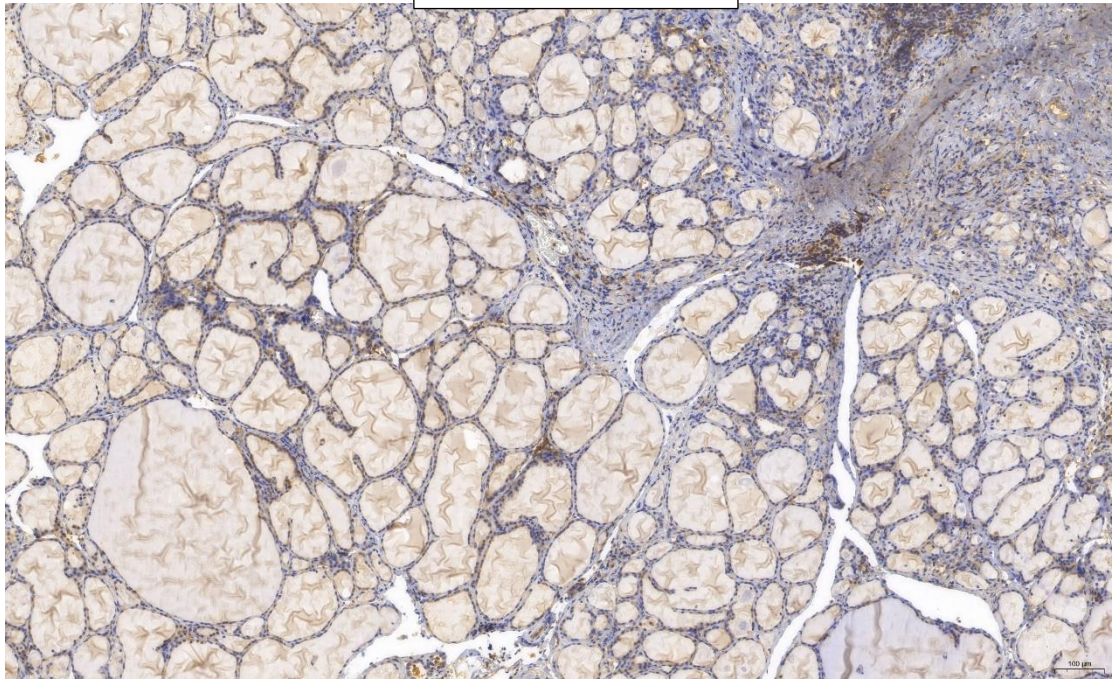

F1D-Patient4-Normal

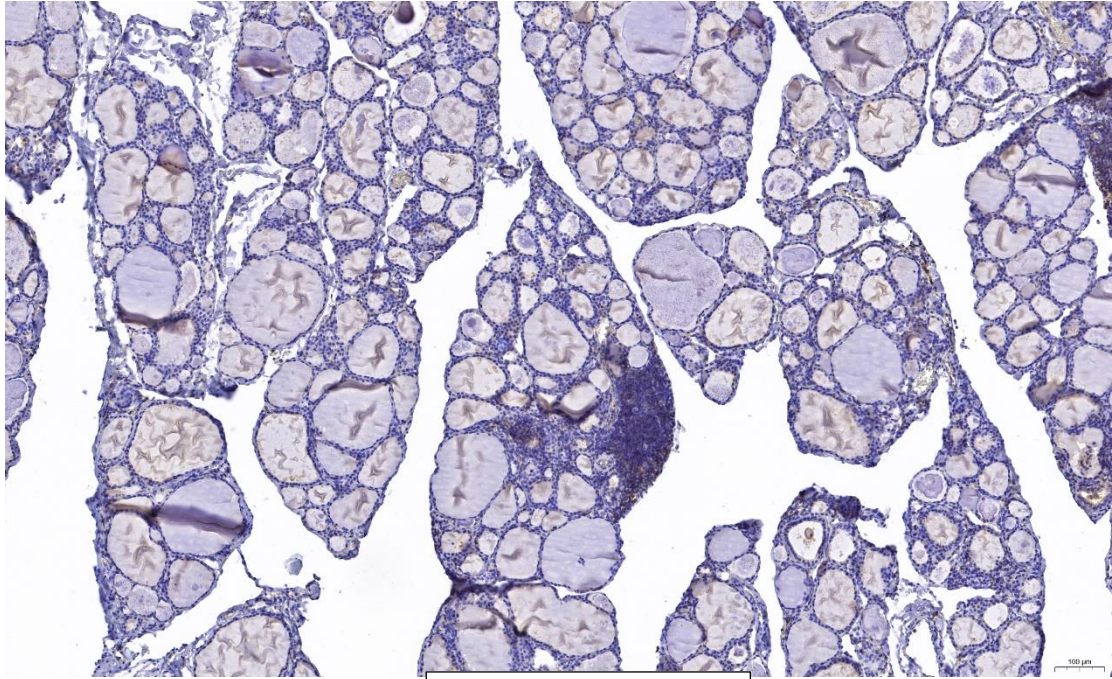

F1D-Patient4-Tumor

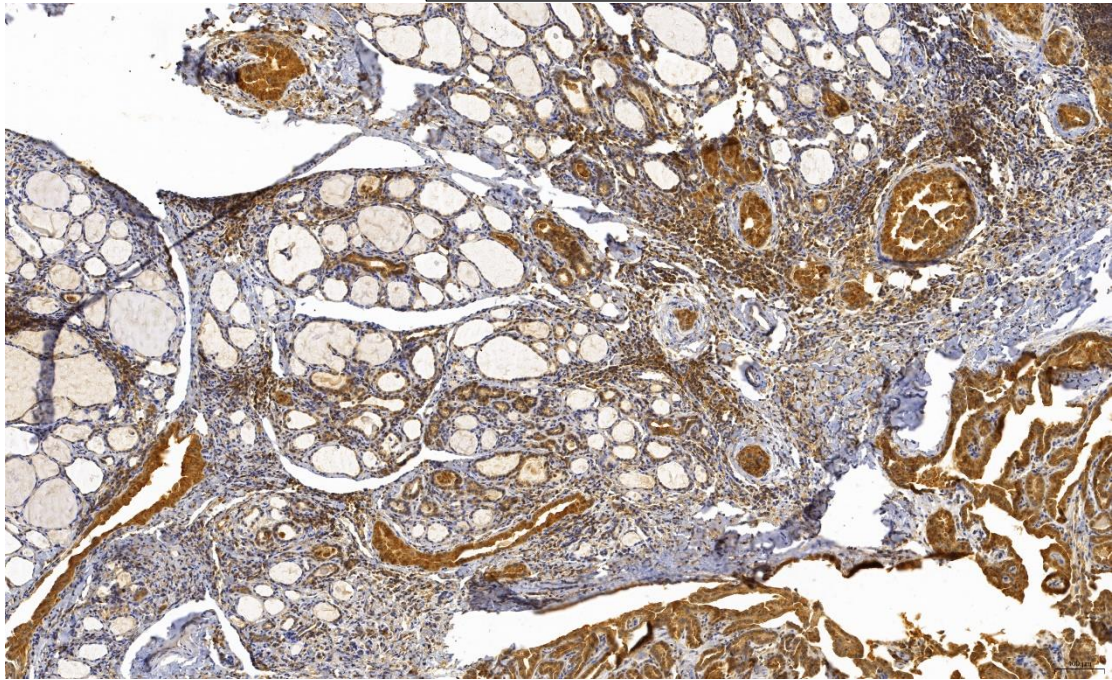

F1D-Patient5-Normal

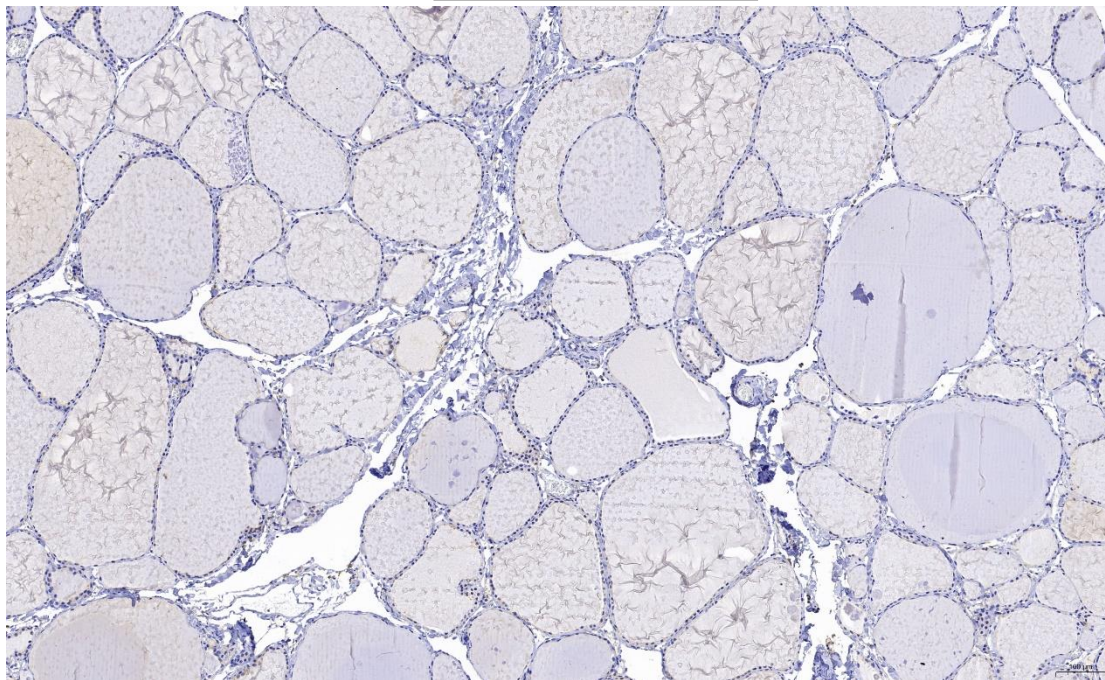

F1D-Patient5-Tumor

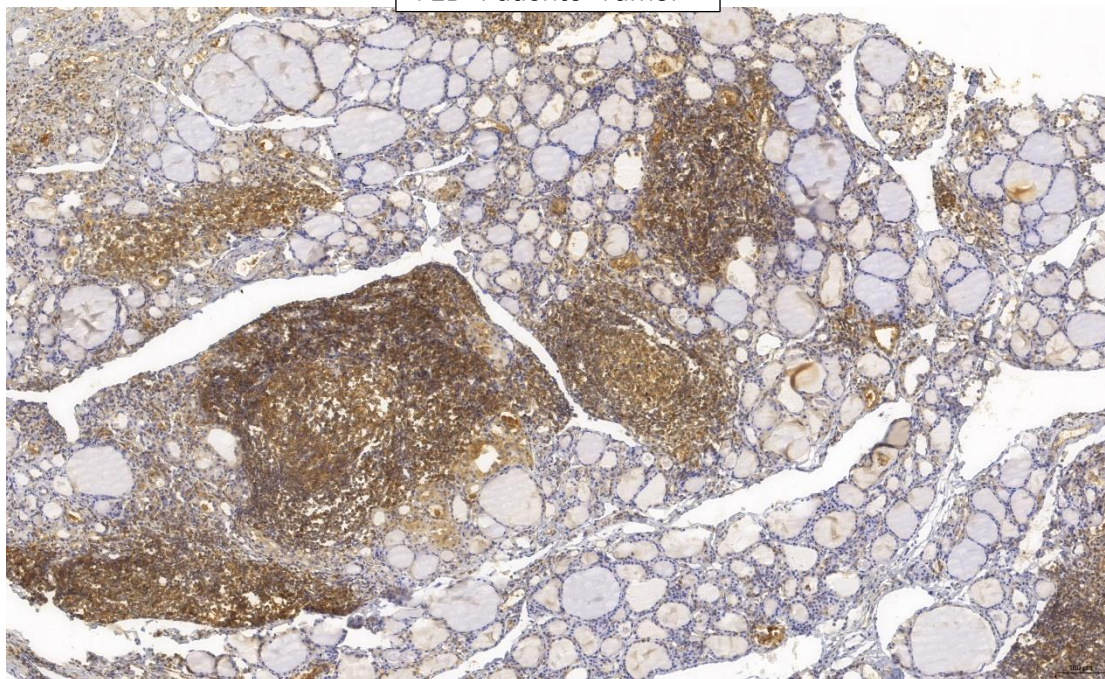

F1D-Patient6-Normal

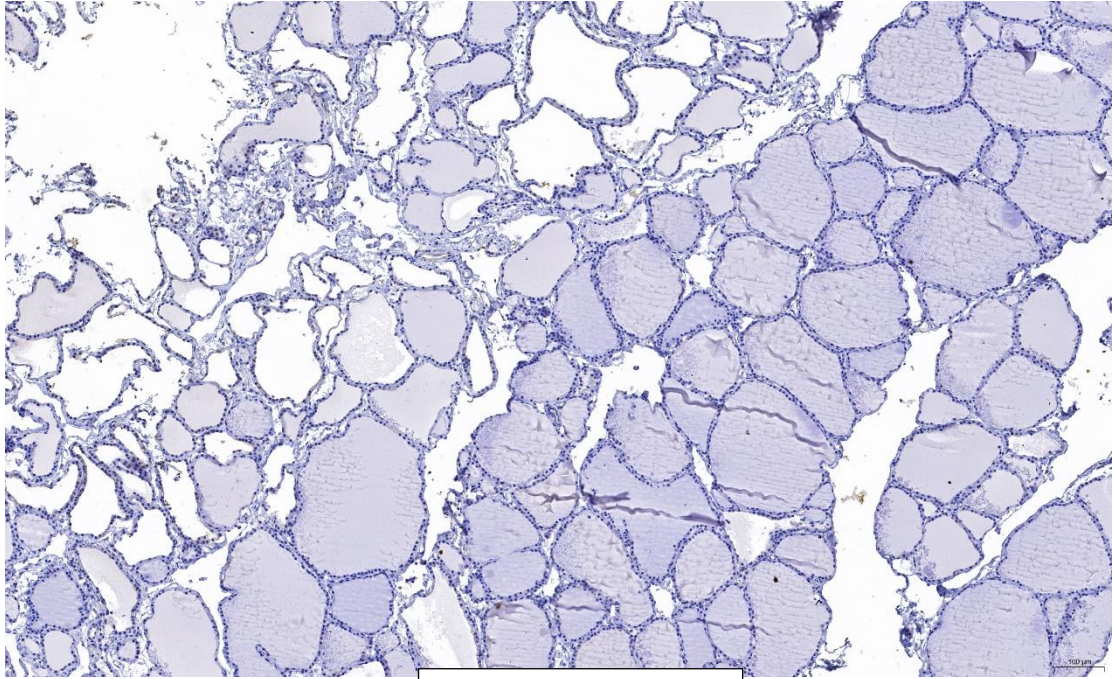

F1D-Patient6-Tumor

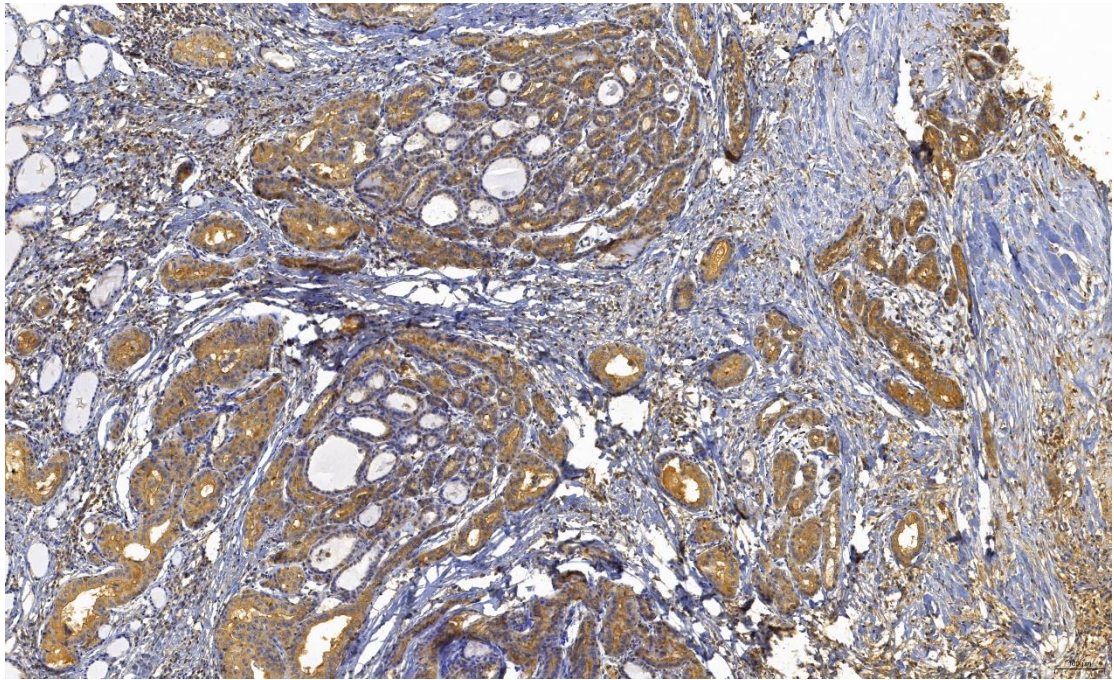

F2E-Patient7-Normal

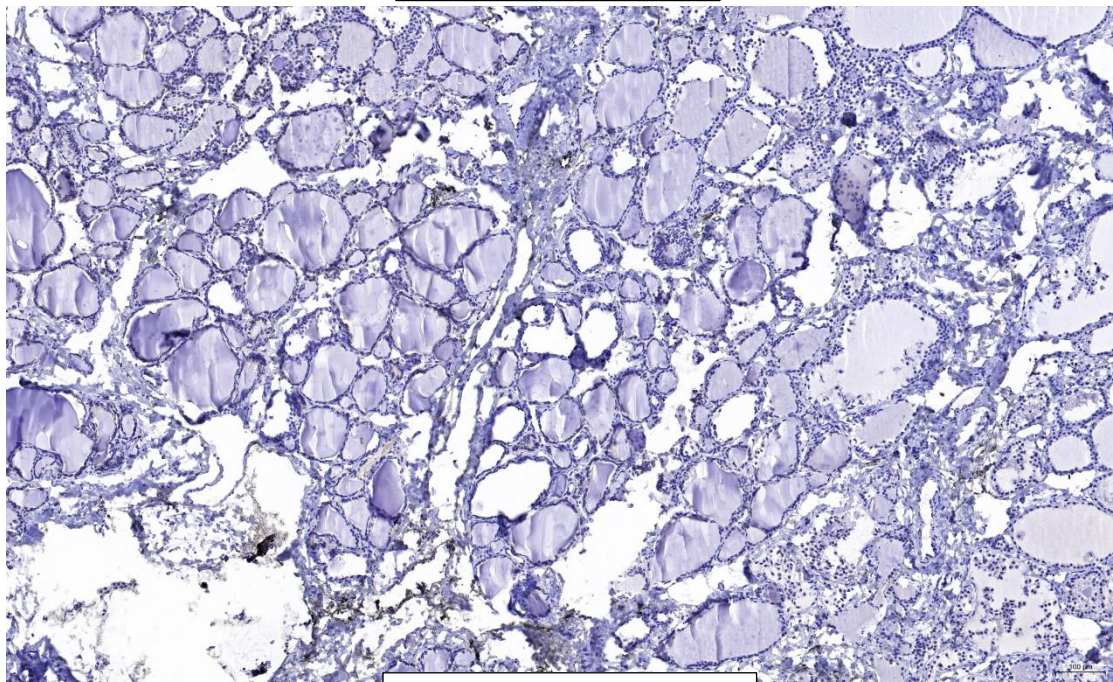

F2E-Patient7-Normal-HE

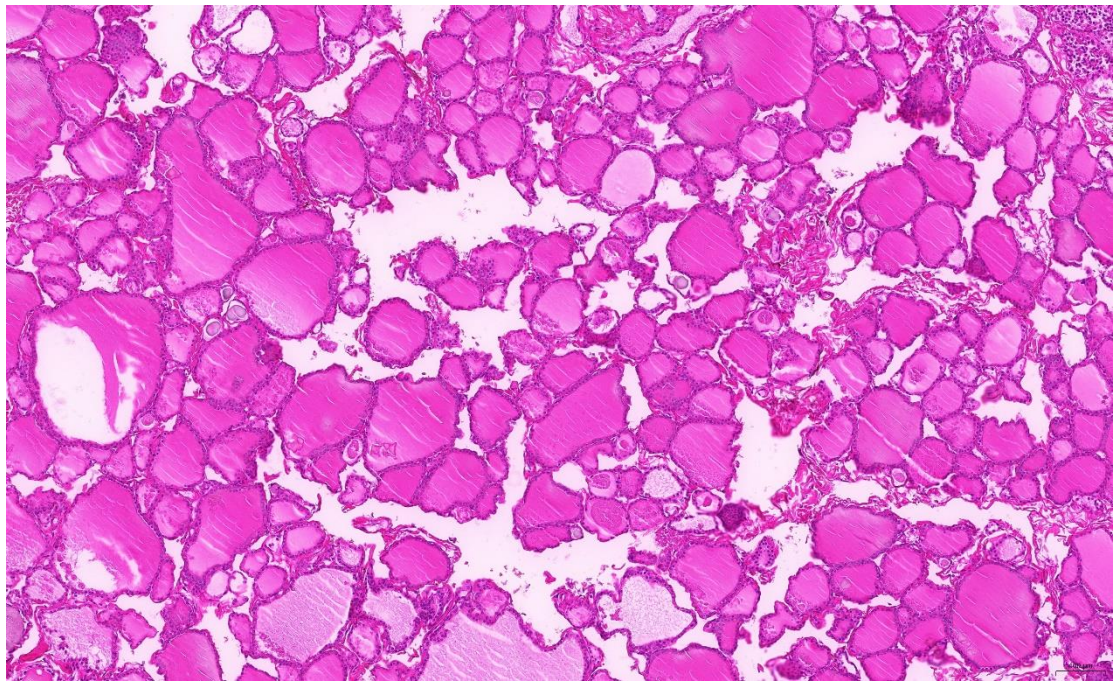

F2E-Patient7-Tumor

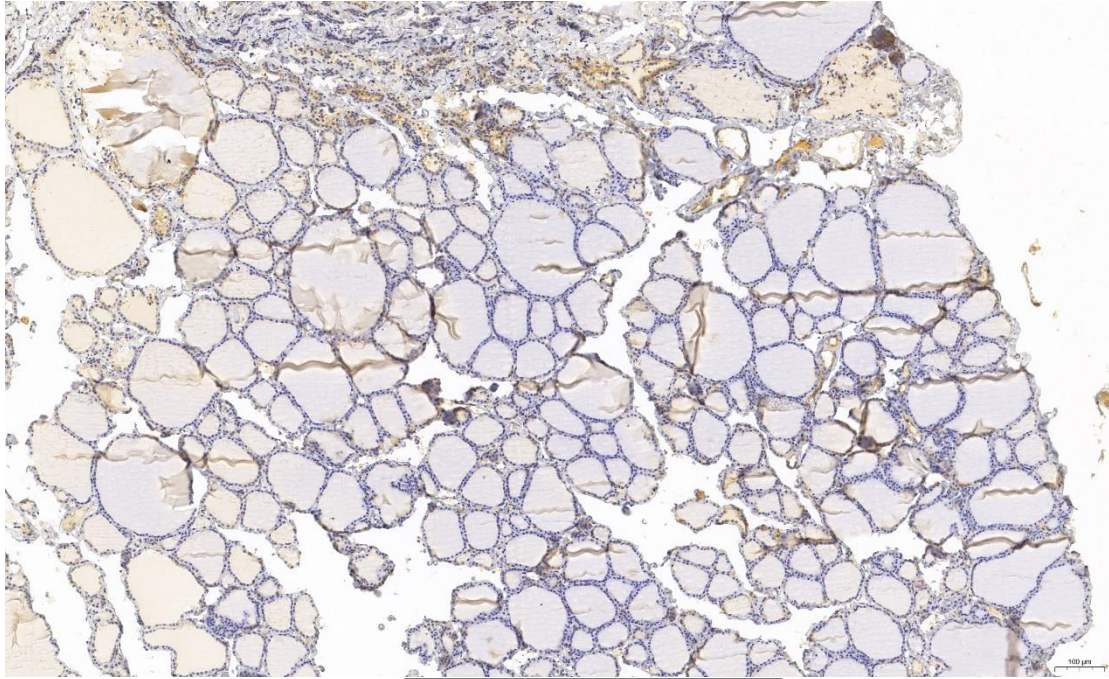

F2E-Patient7-Tumor-HE

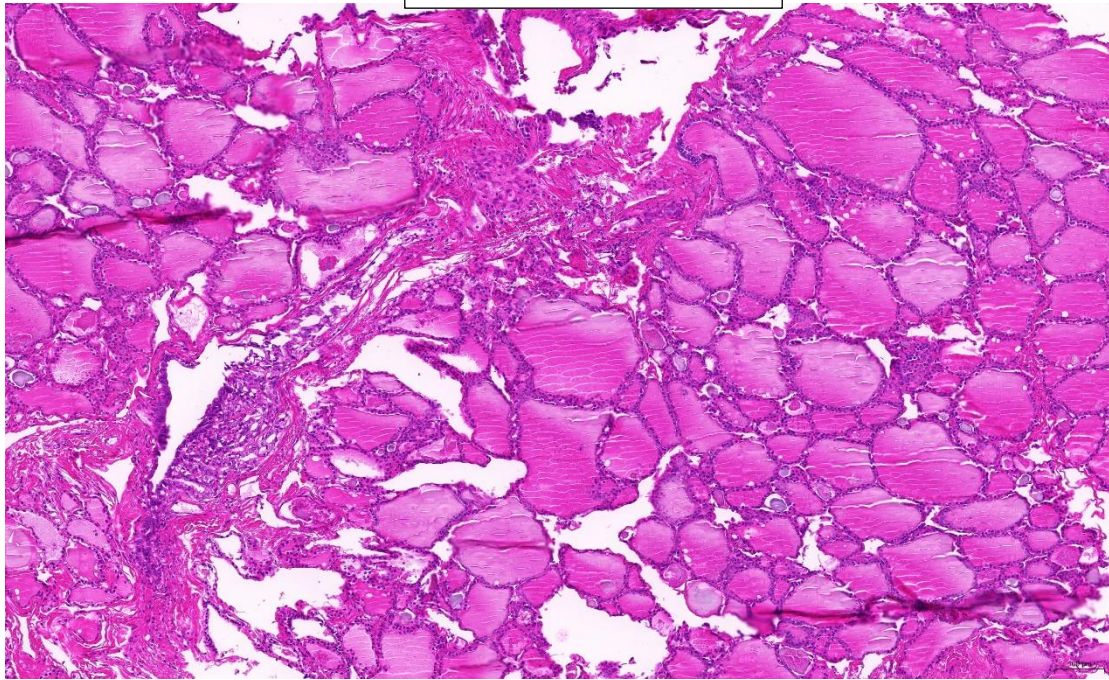

F2E-Patient8-Normal

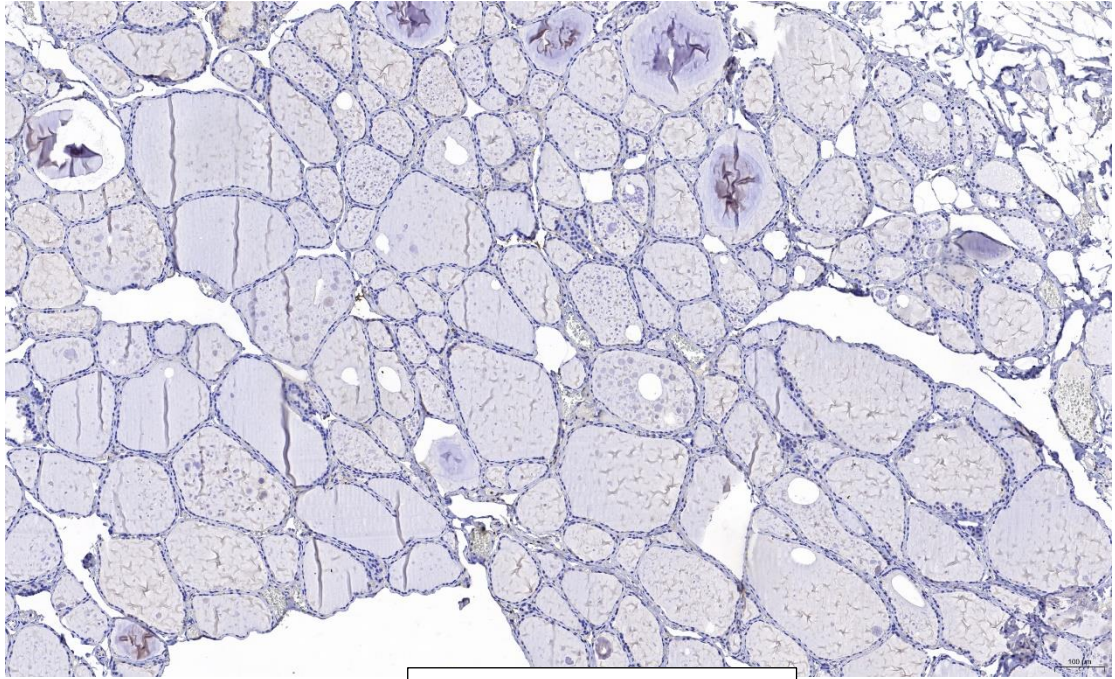

F2E-Patient8-Normal-HE

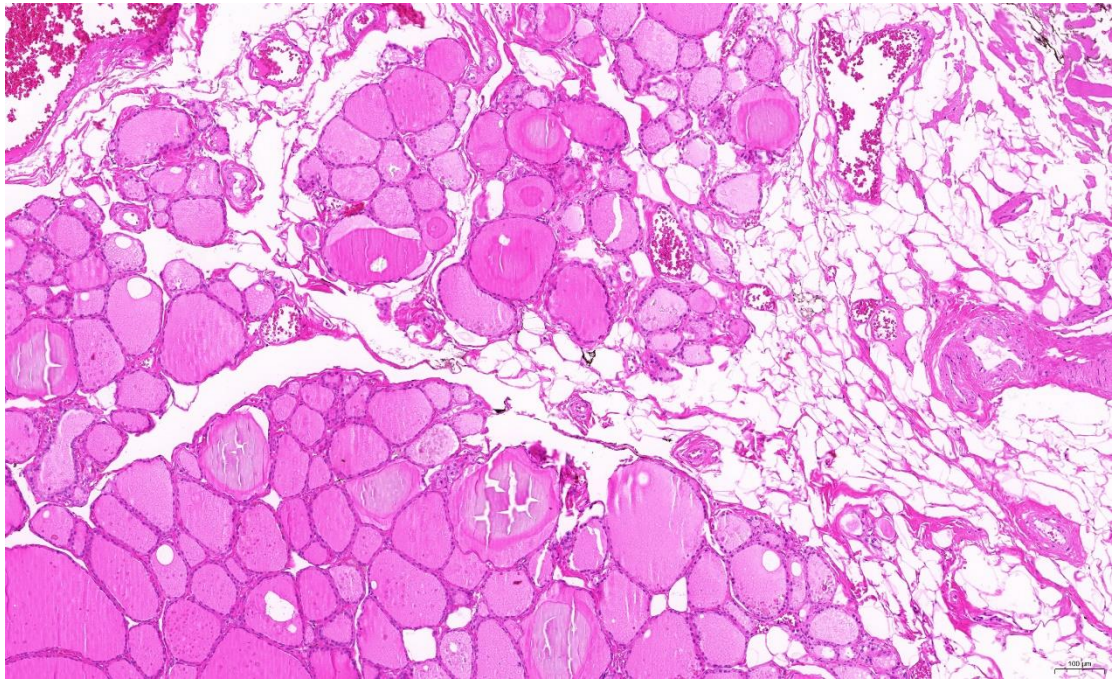

F2E-Patient8-Tumor

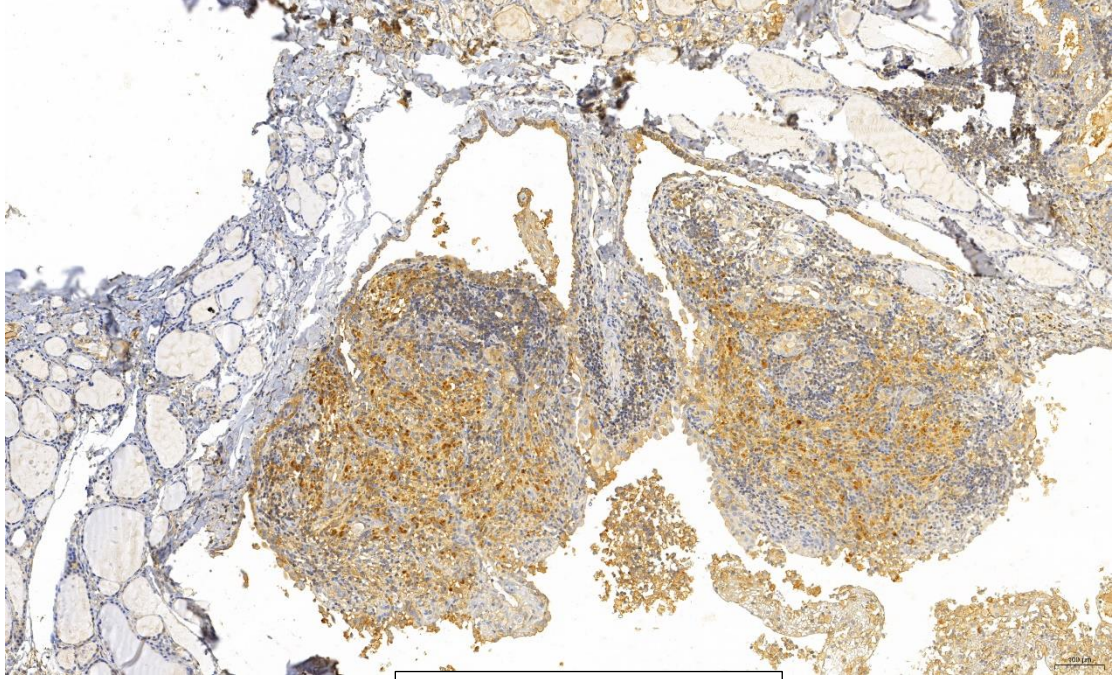

F2E-Patient8-Tumor-HE

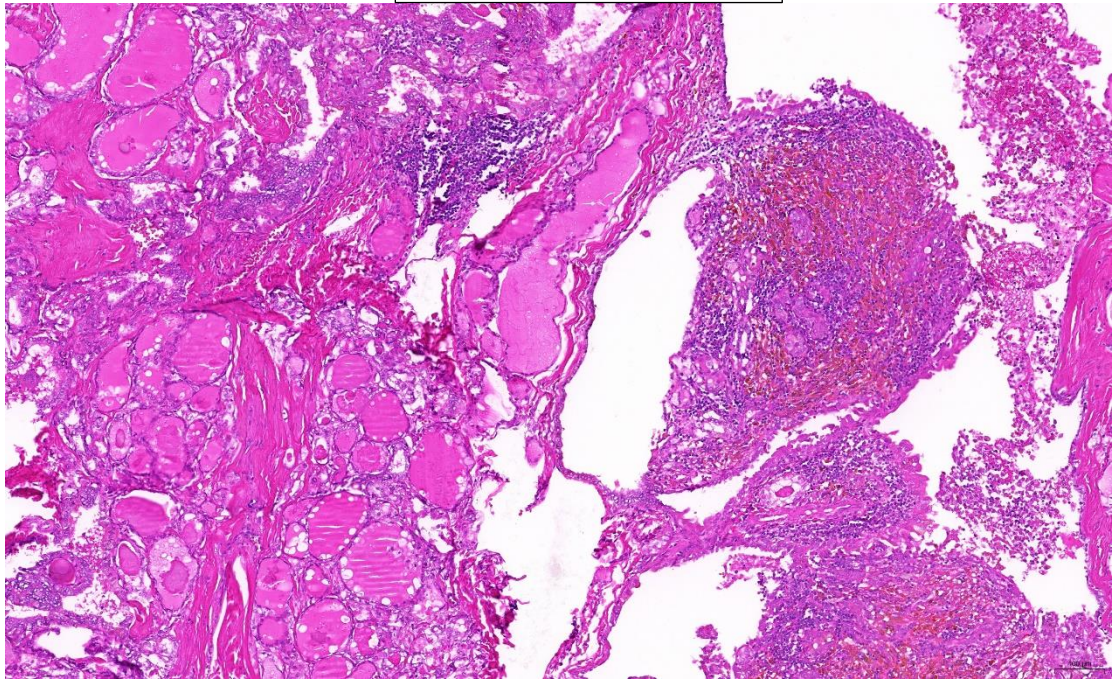

F2E-Patient9-Normal

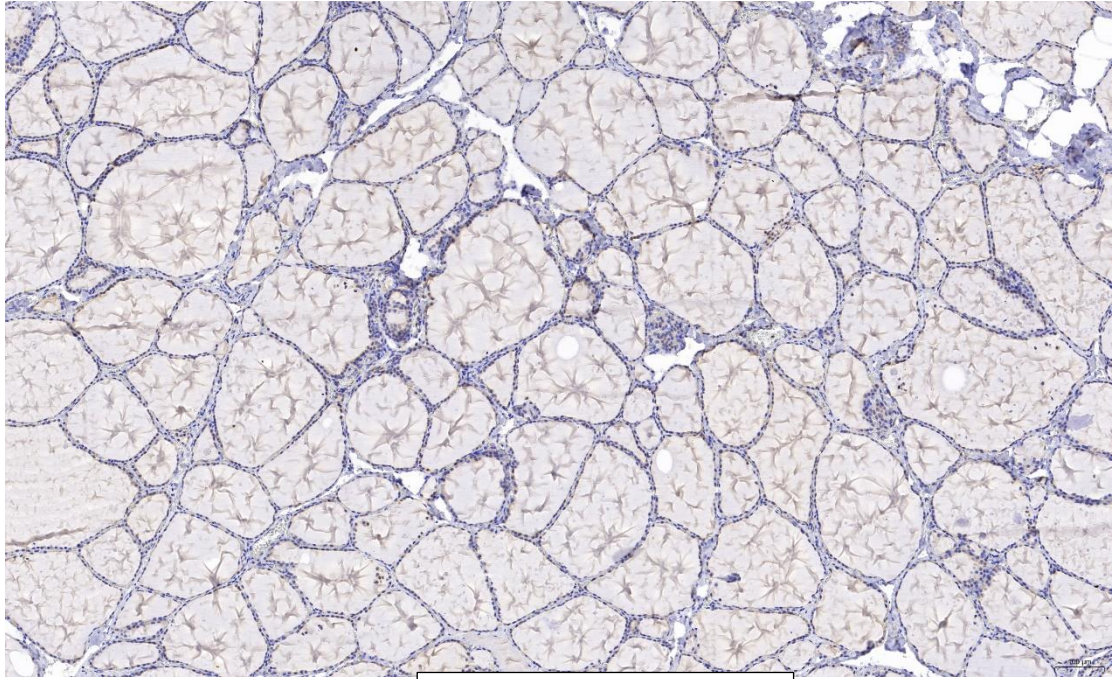

F2E-Patient9-Normal-HE

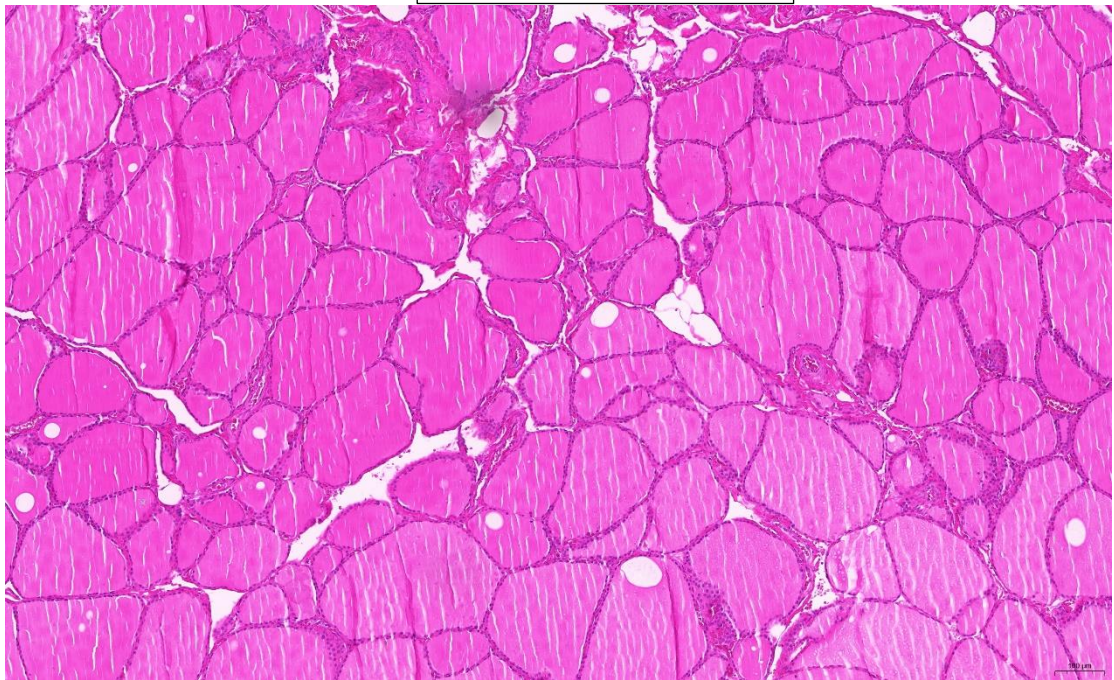

F2E-Patient9-Tumor

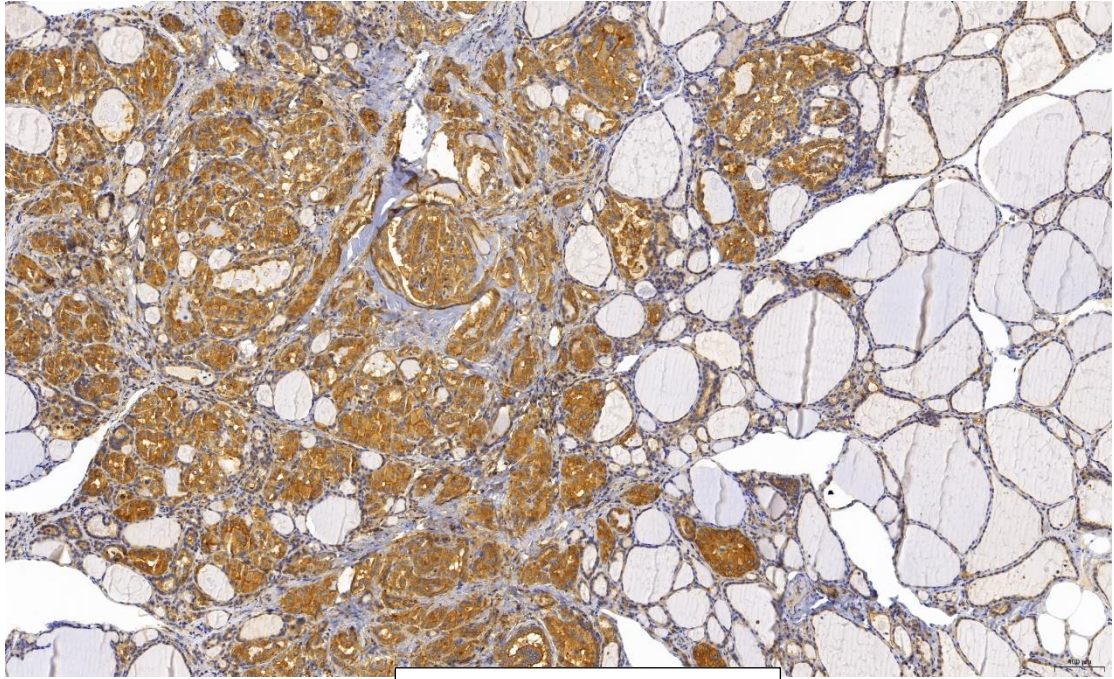

F2E-Patient9-Tumor-HE

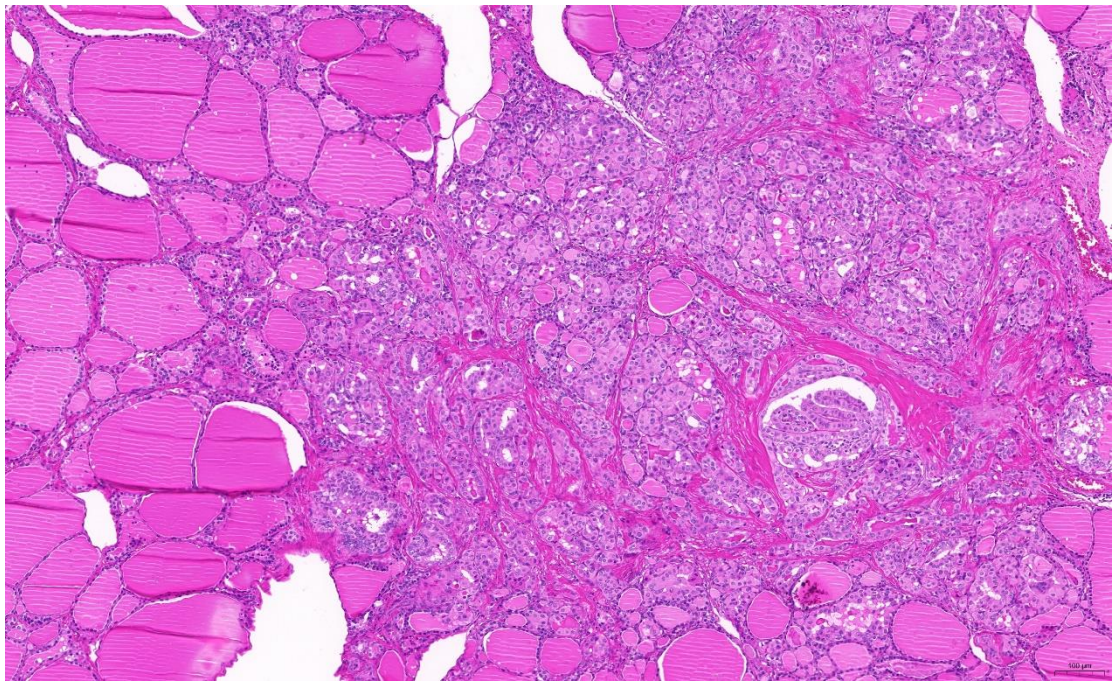

F3C-BCPAP-0h

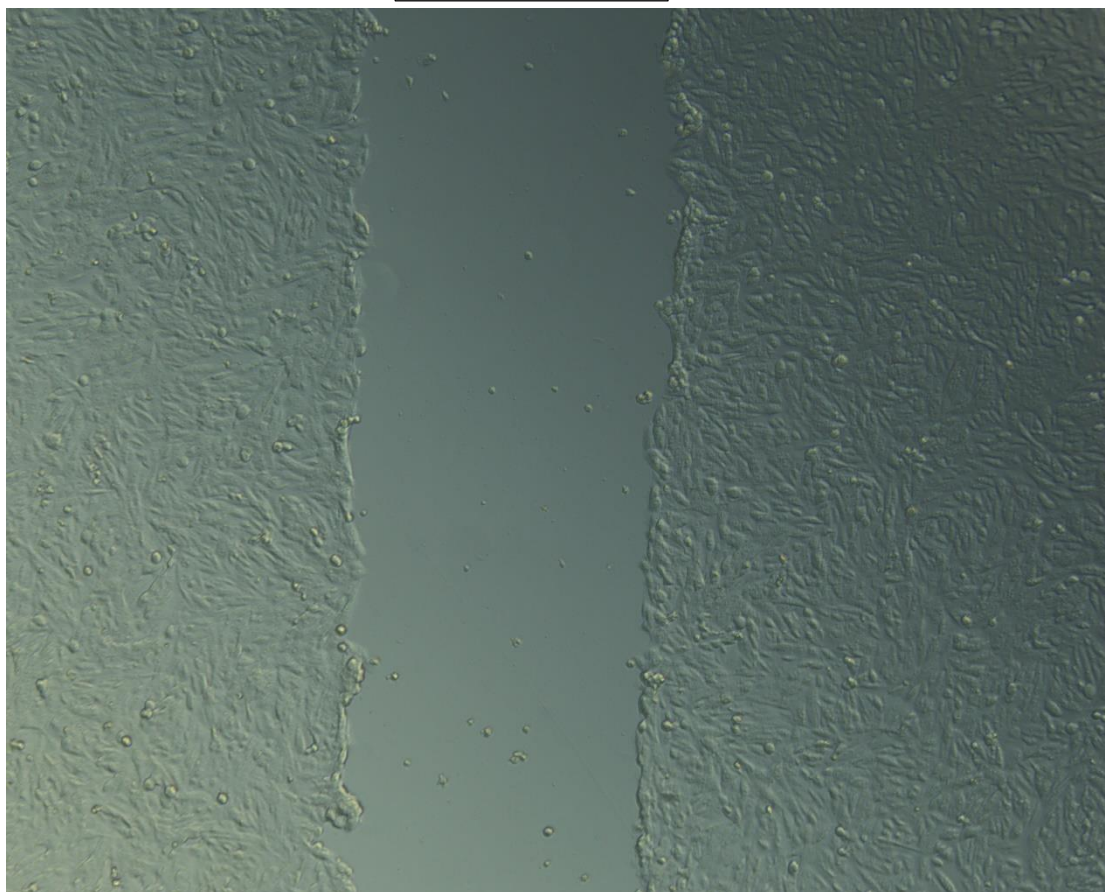

F3C-BCPAP-24h

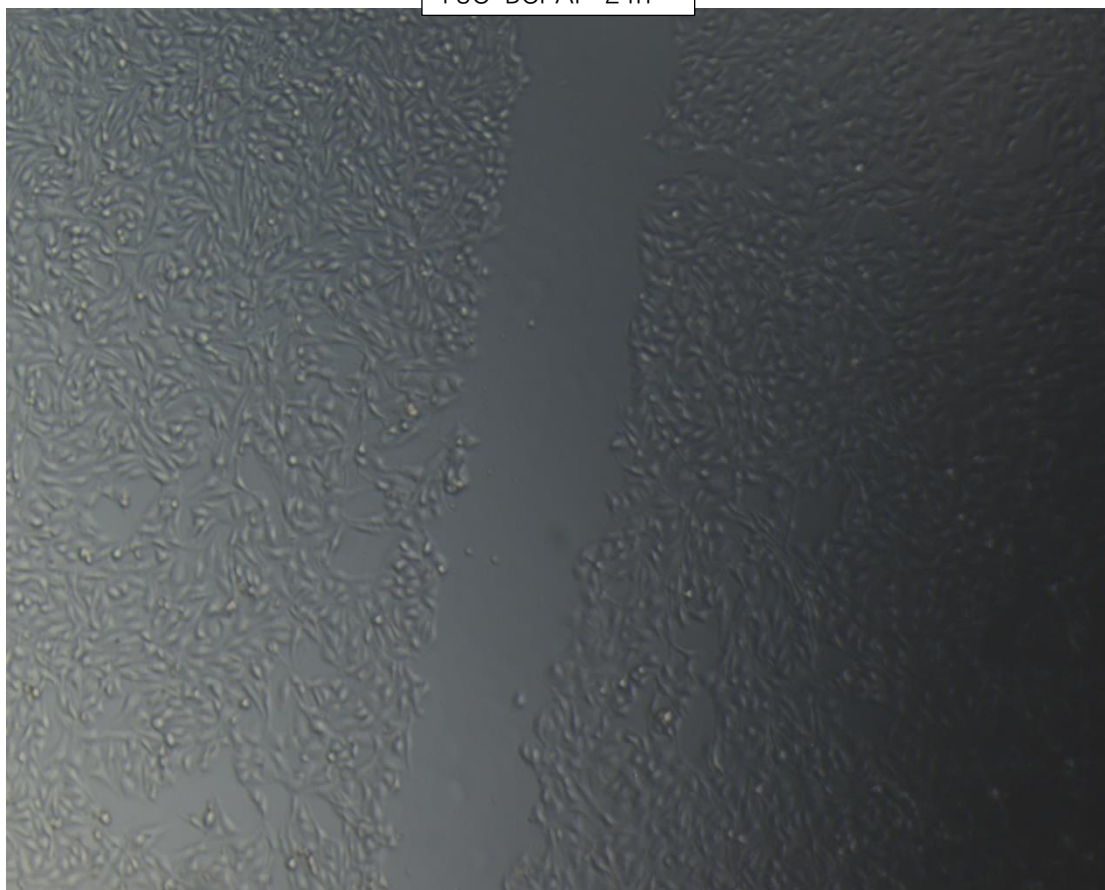

F3C-BCPAP<sup>Met-/-</sup> -0h

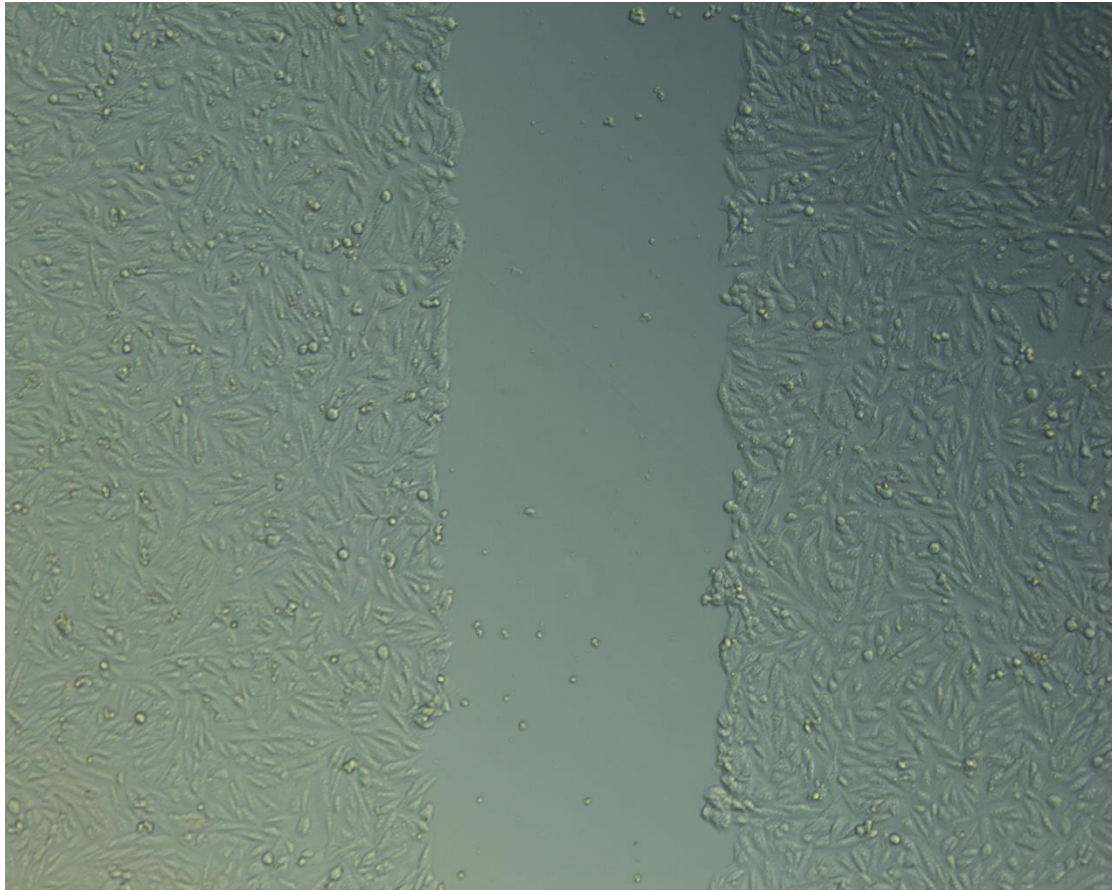

F3C-BCPAP<sup>Met-/-</sup> -24h

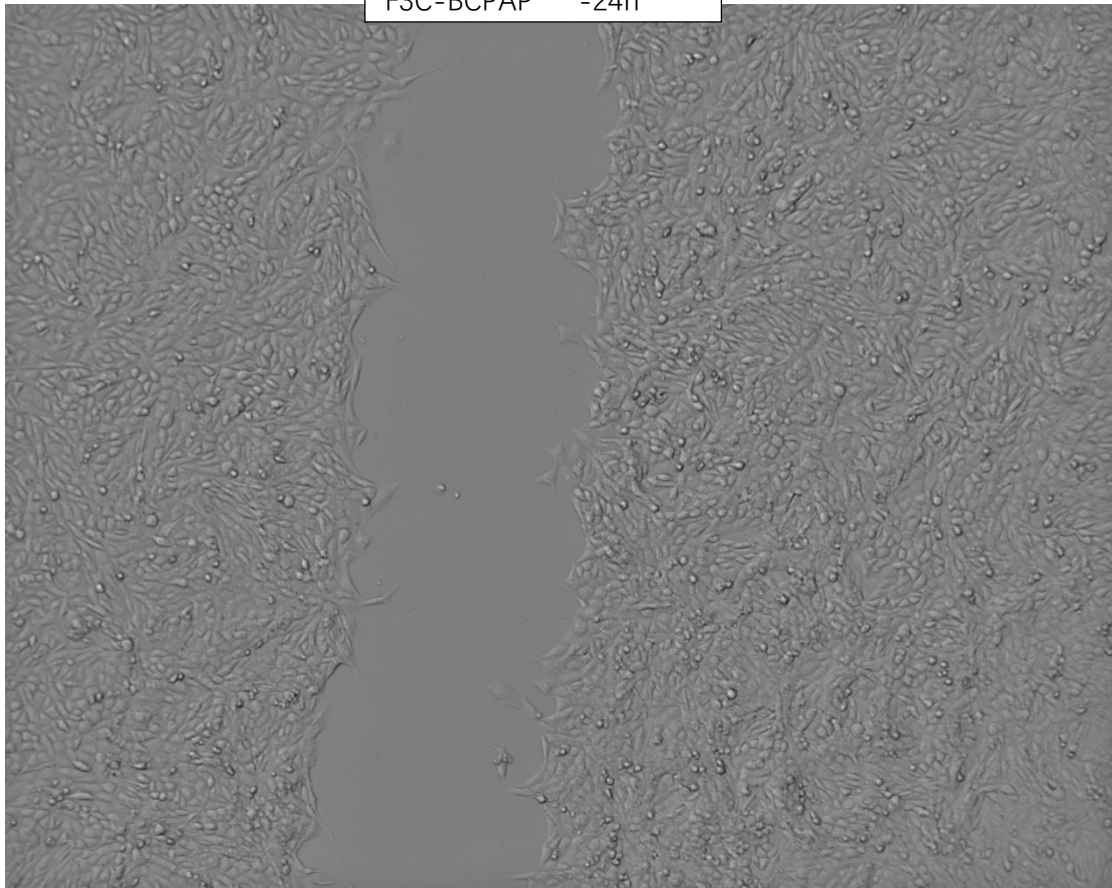

F3C-TPC1-0h

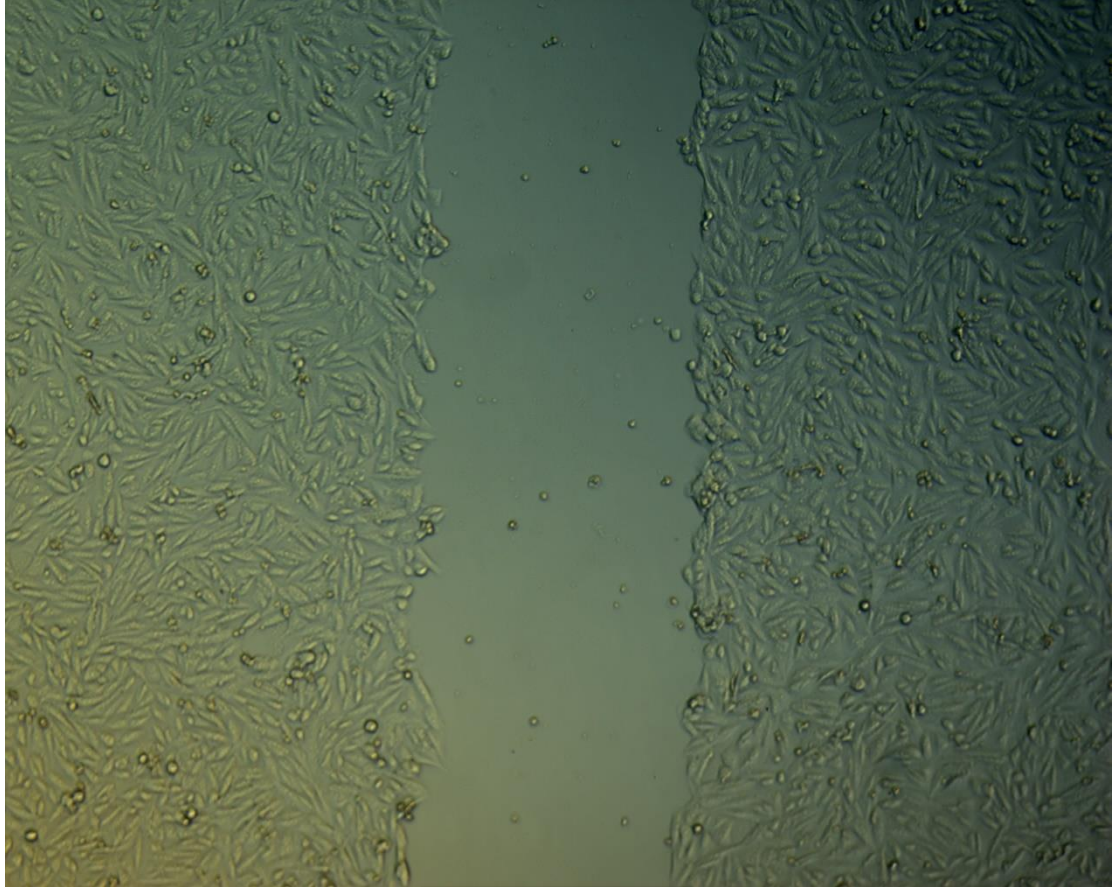

F3C-TPC1-24h

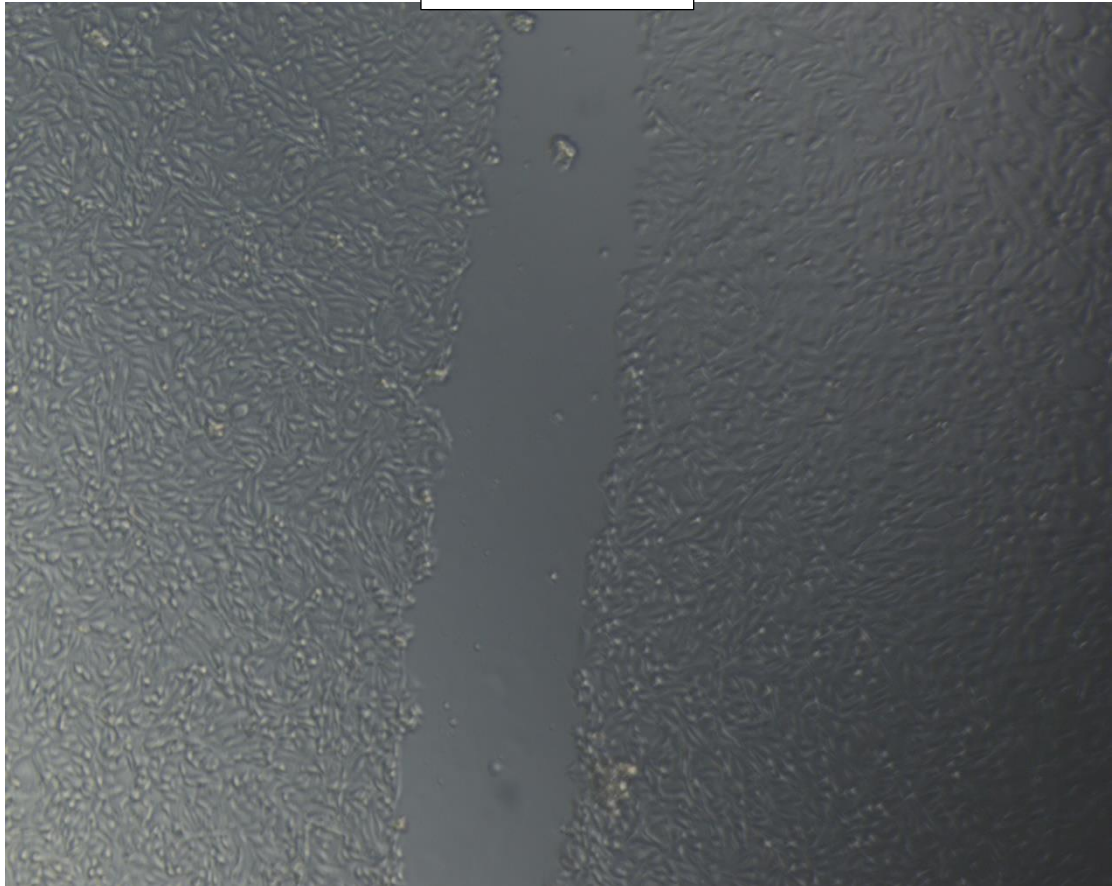

F3C-TPC1<sup>Met-/-</sup> -0h

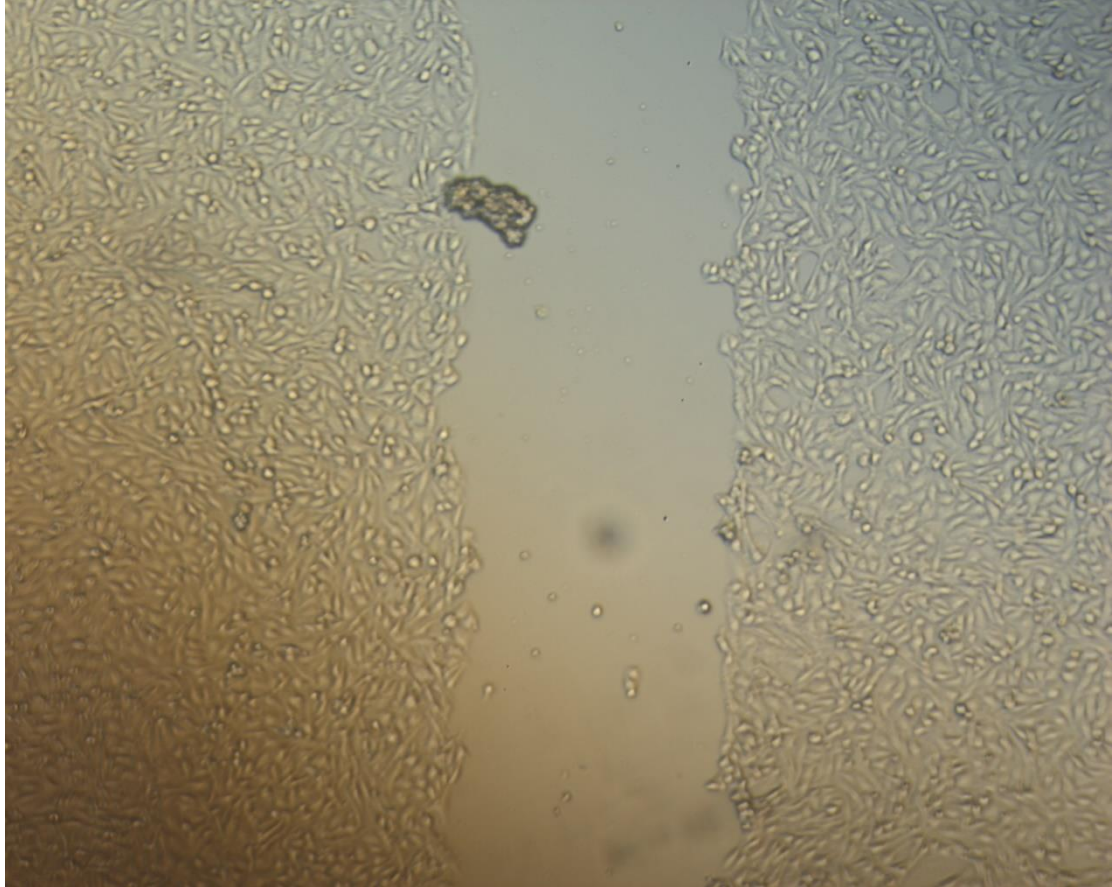

F3C-TPC1<sup>Met-/-</sup> -24h

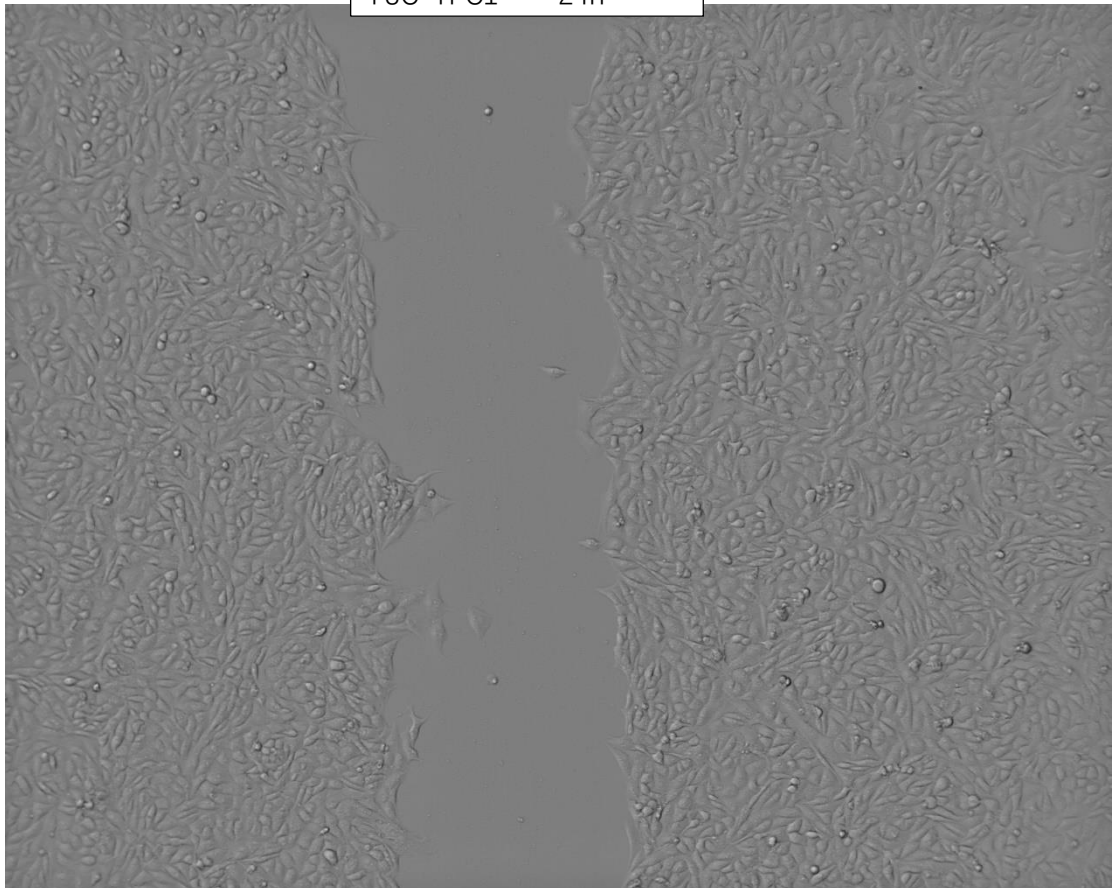

F3D-BCPAP<sup>Met-/-</sup>

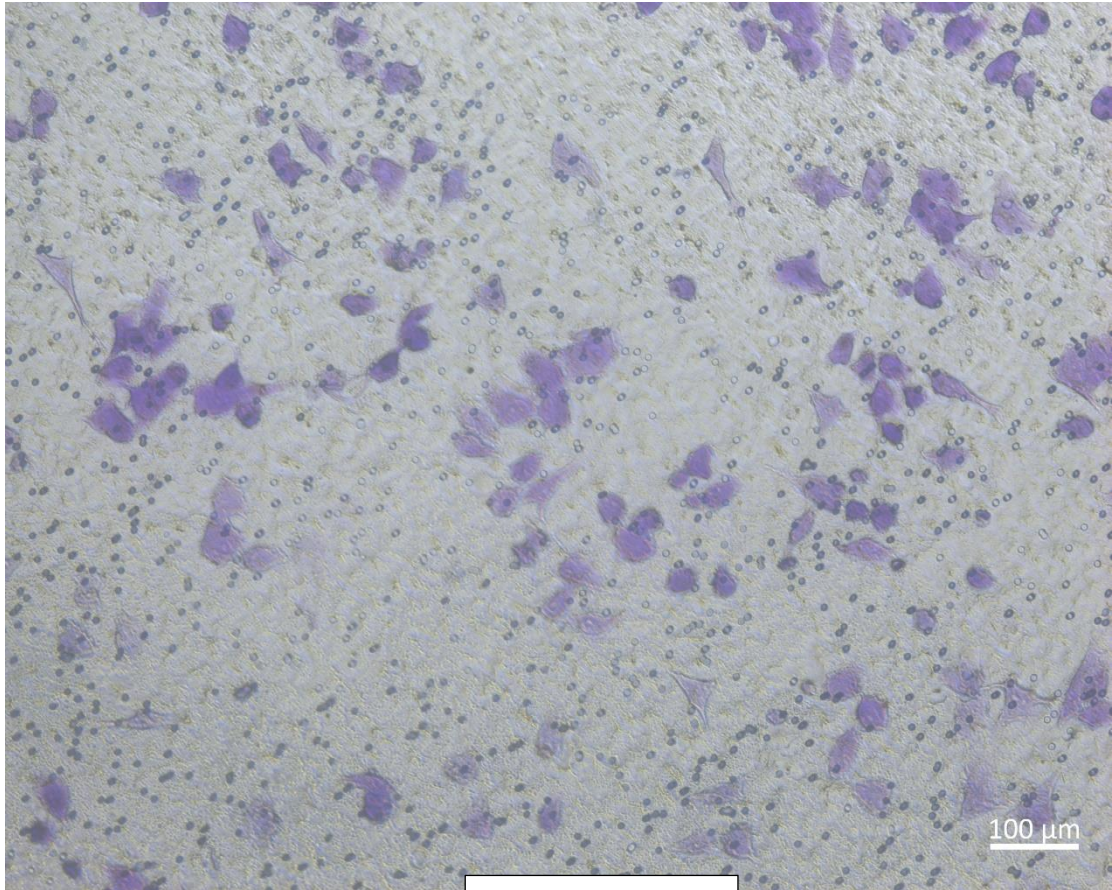

F3D-BCPAP

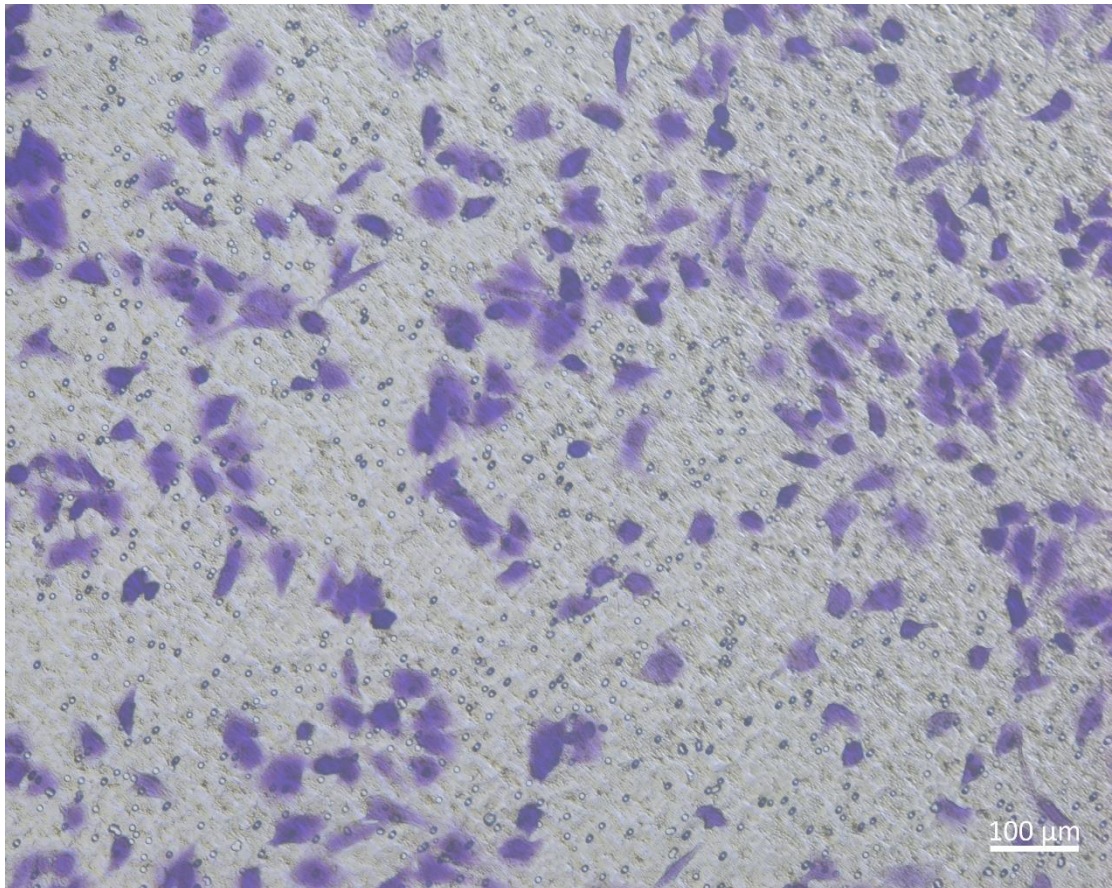

F3D-TPC1

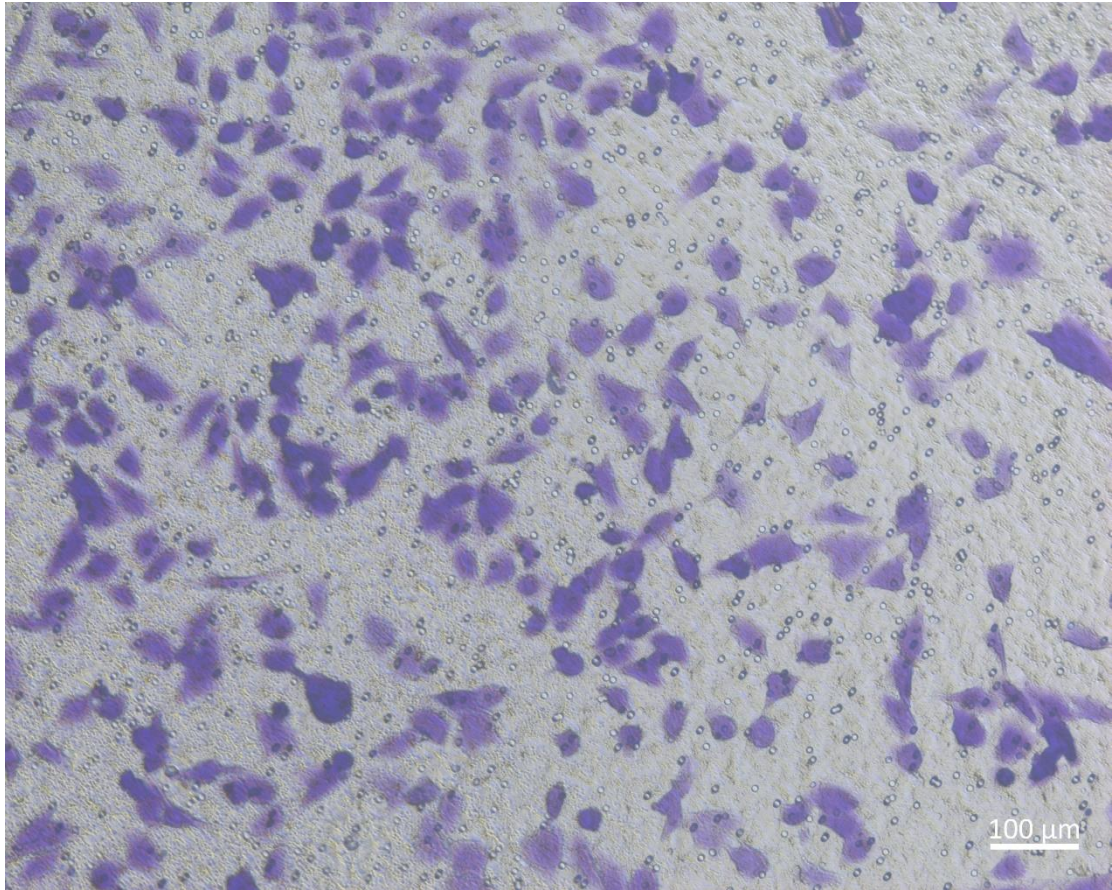

F3D-TPC1<sup>Met-/-</sup>

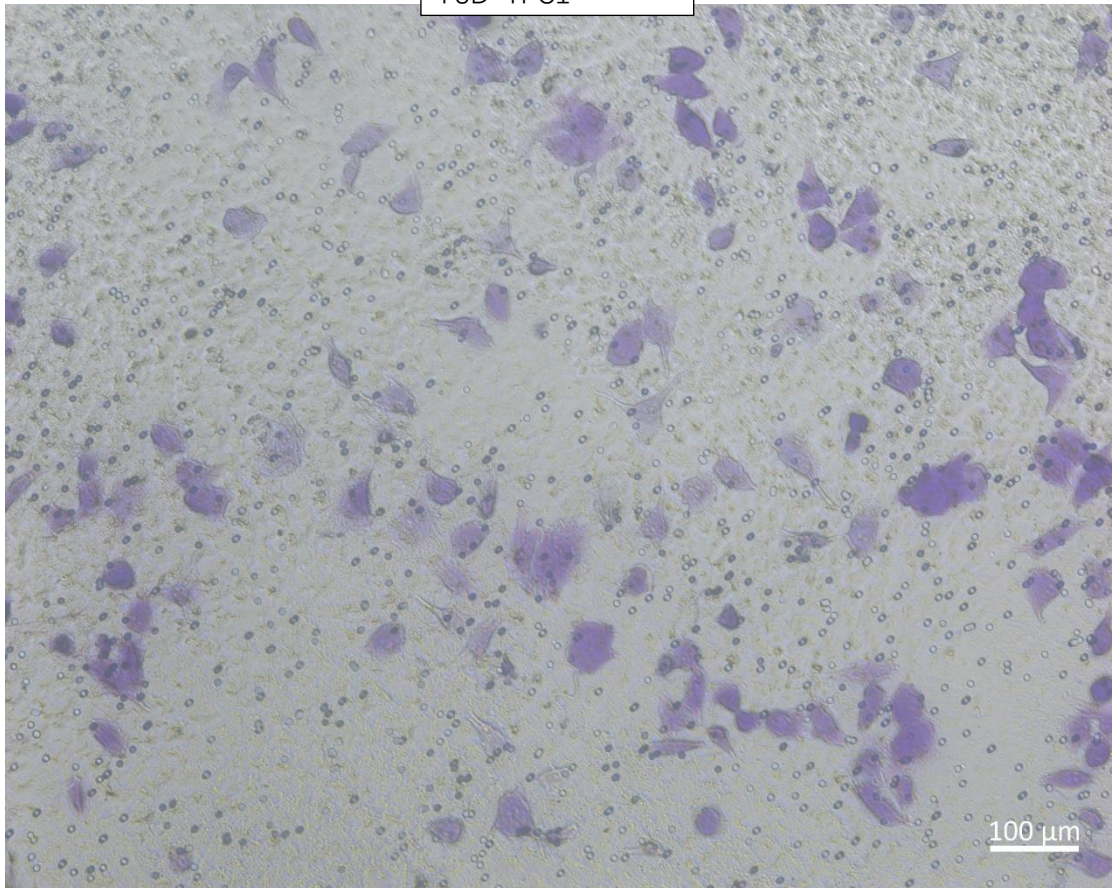

Supplement: MOESM1 [file 41598_2025_23587_MOESM1_ESM.pdf]
